# Supplementary material for: Estimating Overall and Cause-Specific Excess Mortality during the COVID-19 Pandemic: Methodological Approaches Compared
Source: MDPI journal article supplement (doi:10.3390/ijerph20115941), 2023-05-24
Supplement: s1 [file s1]

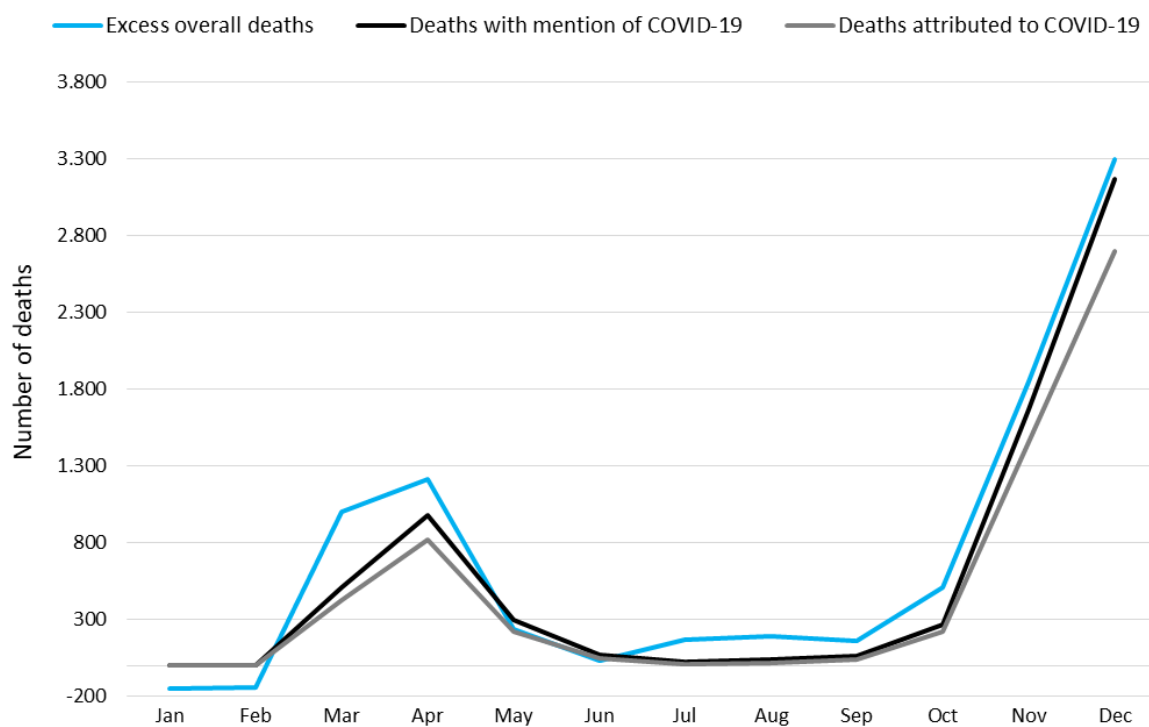

**Supplementary Figure S1.** All-cause excess deaths (approach based on *number of deaths*), deaths with mention of COVID-19 and deaths attributed to COVID-19 for all causes by month of death during 2020 (Veneto Region, Italy).
